# Supplementary material for: Genomic and biological characterization of Streptomyces strains isolated from barley
Source: Research Square preprint supplement (doi:10.21203/rs.3.rs-6679830/v1), 2025-05-30
Supplement: Supplementary file 1 [file 2ff7878905a74c06708f4cc9.xlsx]

## Sheet: PM1
Additional file 5: Optical density of Streptomyces sp. GPA1/GPAT2/GPN2 and S. misionensis in Biolog PM1 microarrays. The optical density (590 nm) was measured after one week of growth and the optical density of the control was subtracted from those values. Arbitrarily, we have defined 4 different growth patterns, depending on the optical density measured: no growth for optical densities below 0.0…
Blank subtracted	1	2	3	4	5	6	7	8	9	10	11	12
Molecules tested	Negative Control	L-Arabinose	N-Acetyl-DGlucosamine	D-Saccharic Acid	Saccharic Acid	D-Galactose	L-Aspartic Acid	L-Proline	D-Alanine	D-Trehalose	D-Mannose	Dulcitol
GPA1	0	++	++	-	+/-	++	++	++	-	+/-	+/-	-
S. misionensis	0	++	++	-	++	++	++	++	-	-	+	-
GPAT2	0	+/-	++	+/-	++	++	++	++	+	+/-	+	+/-
GPN2	0	+	++	-	+	++	++	++	+/-	+/-	+	-
Molecules tested	D-Serine	D-Sorbitol	Glycerol	L-Fucose	D-Glucuronic Acid	D-Gluconic Acid	D,L-α-GlycerolPhosphate	D-Xylose	L-Lactic Acid	Formic Acid	D-Mannitol	L-Glutamic Acid
GPA1	-	-	++	-	++	++	-	-	+/-	-	++	++
S. misionensis	-	+/-	++	-	++	++	-	++	++	++	++	++
GPAT2	-	+/-	++	+/-	++	++	+/-	+	+	+	++	++
GPN2	-	+/-	++	+/-	++	++	+/-	+/-	+	+/-	++	++
Molecules tested	D-Glucose-6- Phosphate C2 D-Galactonic Acid-γ-Lactone C3 D,L-Malic Acid C4 D-Ribose C5 Tween 20 C6 L-Rhamnose C7 D-Fructose C8 Acetic Acid C9 α-D-Glucose C10 Maltose C11 D-Melibiose C12 Thymidine	D-Galactonic Acid-γ-Lactone	D,L-Malic Acid	D-Ribose	Tween 20	L-Rhamnose	D-Fructose	Acetic Acid	α-D-Glucose	Maltose	D-Melibiose	Thymidine
GPA1	-	-	+/-	++	++	-	+	++	++	-	-	-
S. misionensis	-	-	++	++	++	-	+	++	++	+	+	+/-
GPAT2	+/-	-	++	++	++	-	+/-	++	++	+/-	+/-	++
GPN2	+/-	-	++	++	++	-	+/-	++	++	+/-	+/-	++
Molecules tested	L-Asparagine	D-Aspartic Acid	D-Glucosaminic Acid	1,2-Propanedio	Tween 40	α-Keto-Glutaric Acid	α-Keto-Butyric Acid	α-Methyl-DGalactoside	α-D-Lactose	Lactulose	Sucrose	Uridine
GPA1	+	-	++	-	++	-	-	-	-	-	-	-
S. misionensis	++	-	++	-	++	+	++	-	+/-	+	+/-	-
GPAT2	++	-	+/-	-	++	+	++	+/-	+/-	+/-	-	+/-
GPN2	++	-	+/-	+/-	++	+	++	+/-	+/-	+/-	-	+/-
Molecules tested	L-Glutamine	m-Tartaric Acid	D-Glucose-1- Phosphate	D-Fructose-6- Phosphate	Tween 80	α-Hydroxy Glutaric Acid-γLactone	α-Hydroxy Butyric Acid	ß-Methyl-DGlucoside	Adonitol	Maltotriose	2-Deoxy Adenosine	Adenosine
GPA1	++	-	-	-	++	-	-	-	-	++	+/-	+
S. misionensis	++	-	-	-	++	-	++	-	-	++	+	++
GPAT2	++	+/-	-	-	++	+/-	++	+/-	+/-	++	-	++
GPN2	++	+/-	-	-	++	+/-	++	+/-	-	++	+/-	++
Molecules tested	Glycyl-L-Aspartic Acid	Citric Acid	myo-Inositol	D-Threonine	Fumaric Acid	Bromo Succinic Acid	Propionic Acid	Mucic Acid	Glycolic Acid	Glyoxylic Acid	D-Cellobiose	Iosine
F_GPA1	-	-	+	-	-	-	+/-	-	-	-	++	+
F_misionensis	+/-	++	++	++	++	++	++	+/-	-	+/-	++	++
F_GPAT2	+	+	+/-	-	++	++	++	-	+/-	-	++	++
F_GPN2	+	+	+/-	+/-	++	++	++	-	+/-	-	++	++
Molecules tested	Glycyl-L-Glutamic Acid	Tricarballylic Acid	L-Serine	L-Threonine	L-Alanine	L-Alanyl-Glycine	Acetoacetic Acid	N-Acetyl-ß-DMannosamine	Mono Methyl Succinate	Methyl Pyruvate	D-Malic Acid	L-Malic Acid
GPA1	+/-	-	+	++	++	++	+/-	-	+/-	+/-	-	+/-
S. misionensis	++	++	++	++	++	++	++	+/-	+	++	+/-	++
GPAT2	+	-	++	++	++	++	+	+/-	++	+/-	+	++
GPN2	+	-	++	++	++	++	++	+/-	++	+	+/-	++
Molecules tested	Glycyl-L-Proline H2 p-Hydroxy Phenyl Acetic Acid H3 m-Hydroxy Phenyl Acetic Acid H4 Tyramine H5 D-Psicose H6 L-Lyxose H7 Glucuronamide H8 Pyruvic Acid H9 L-Galactonic Acid-γ-Lactone H10 D-Galacturonic Acid H11 Phenylethylamine H12 2-Aminoethanol	p-Hydroxy Phenyl Acetic Acid	m-Hydroxy Phenyl Acetic Acid	Tyramine	D-Psicose	L-Lyxose	Glucuronamide	Pyruvic Acid	L-Galactonic Acid-γ-Lactone	D-Galacturonic Acid	Phenylethylamine	2-Aminoethanol
GPA1	++	-	-	-	-	-	-	+/-	-	-	-	-
S. misionensis	++	-	+	++	-	+/-	-	++	-	-	+	++
GPAT2	++	-	+	-	+/-	+/-	+/-	++	+/-	+/-	+/-	++
GPN2	++	-	+	-	+/-	+/-	+/-	+	+/-	+/-	+/-	++

## Sheet: PM2
Additional file 5: Optical density of Streptomyces sp. GPA1/GPAT2/GPN2 and S. misionensis in Biolog PM2A microarrays. The optical density (590 nm) was measured after one week of growth and the optical density of the control was subtracted from those values. Arbitrarily, we have defined 4 different growth patterns, depending on the optical density measured: no growth for optical densities below 0.…
Colonne1	1	2	3	4	5	6	7	8	9	10	11	12
Molecules tested	Negative Control	Chondroitin Sulfate	α-Cyclodextrin	ß-Cyclodextrin	γ-Cyclodextrin	Dextrin	Gelatin	Glycogen	Inulin	Laminarin	Mannan	Pectin
GPA1	0	++	-	-	++	++	++	++	+/-	++	-	-
S. misionensis	0	+	-	-	+/-	++	++	++	+/-	++	+	-
GPAT2	0	+	-	-	+/-	++	++	++	+/-	++	-	-
GPN2	0	+	-	-	-	++	++	++	+/-	++	-	-
Molecules tested	N-Acetyl-DGalactosamine B2 N-AcetylNeuraminic Acid B3 ß-D-Allose B4 Amygdalin B5 D-Arabinose B6 D-Arabitol B7 L-Arabitol B8 Arbutin B9 2-Deoxy-D- Ribose B10 i-Erythritol B11 D-Fucose B12 3-0-ß-DGalactopyranosyl- DArabinose	N-AcetylNeuraminic Acid	ß-D-Allose	Amygdalin	D-Arabinose	D-Arabitol	L-Arabitol	Arbutin	2-Deoxy-D- Ribose	i-Erythritol	D-Fucose	3-0-ß-DGalactopyranosyl- DArabinose
GPA1	-	-	-	-	-	++	-	-	+/-	-	-	-
S. misionensis	+/-	-	-	+/-	-	++	+/-	-	+/-	-	-	-
GPAT2	+/-	-	-	+/-	+	++	+/-	+/-	+/-	+/-	+/-	-
GPN2	+/-	-	-	+/-	-	++	-	-	-	-	-	-
Molecules tested	Gentiobiose	L-Glucose	Lactitol	D-Melezitose	Maltitol	α-Methyl-DGlucoside	ß-Methyl-DGalactoside	3-Methyl Glucose	ß-Methyl-DGlucuronic Acid	α-Methyl-DMannoside	ß-Methyl-DXyloside	Palatinose
GPA1	++	-	-	+/-	-	-	-	-	-	-	-	-
S. misionensis	++	-	+/-	+/-	-	-	+/-	+/-	-	+/-	-	+/-
GPAT2	++	+/-	+/-	+/-	+/-	+/-	+/-	+/-	-	+/-	-	+/-
GPN2	++	-	+/-	+/-	-	-	+/-	+/-	-	+/-	-	-
Molecules tested	D-Raffinose	Salicin	Sedoheptulosan	L-Sorbose	Stachyose	D-Tagatose	Turanose	Xylitol	N-Acetyl-DGlucosaminitol	γ-Amino Butyric Acid	δ-Amino Valeric Acid	Butyric Acid
GPA1	-	-	-	-	-	+/-	-	-	-	+	-	++
S. misionensis	-	-	-	+/-	-	+/-	+/-	-	-	+	-	++
GPAT2	+/-	+/-	+/-	+/-	+/-	+/-	+/-	+/-	+/-	++	+/-	++
GPN2	-	-	-	-	-	+/-	+/-	-	-	++	-	++
Molecules tested	Capric Acid	Caproic Acid	Citraconic Acid	Citramalic Acid	D-Glucosamine	2-Hydroxy Benzoic Acid	4-Hydroxy Benzoic Acid	ß-Hydroxy Butyric Acid	Glycolic Acid	α-Keto-Valeric Acid	Itaconic Acid	5-Keto-DGluconic Acid
GPA1	-	+	-	-	+/-	-	-	++	-	+/-	-	-
S. misionensis	-	++	-	-	+/-	-	++	++	+/-	++	-	-
GPAT2	-	+	+/-	+/-	-	-	-	++	+	++	-	+/-
GPN2	-	+/-	-	-	-	-	-	++	+/-	++	-	+/-
Molecules tested	D-Lactic Acid Methyl Ester	Malonic Acid	Melibionic Acid	Oxalic Acid	Oxalomalic Acid	Quinic Acid	D-Ribono-1,4- Lactone	Sebacic Acid	Sorbic Acid	Succinamic Acid	D-Tartaric Acid	L-Tartaric
GPA1	-	-	-	-	+/-	-	-	++	-	-	+/-	-
S. misionensis	-	+/-	+/-	-	+/-	-	-	++	-	+	+/-	+/-
GPAT2	+/-	+/-	+/-	+/-	+	+/-	-	++	-	+	+	+
GPN2	+/-	+/-	+/-	+/-	+	-	-	+	-	+	+	+
Molecules tested	Acetamide	L-Alaninamide	N-Acetyl-LGlutamic Acid	L-Arginine	Glycine	L-Histidine	L-Homoserine	Hydroxy-LProline	L-Isoleucine	L-Leucine	L-Lysine	L-Methionine
GPA1	-	+	-	++	+	++	-	-	-	-	-	+/-
S. misionensis	-	++	+/-	++	+	+/-	-	+/-	+/-	+/-	+	+
GPAT2	+/-	++	+	+/-	++	++	-	++	-	-	+	-
GPN2	+/-	++	+/-	+/-	+	++	-	+	-	-	+	-
Molecules tested	L-Ornithine	L-Phenylalanine	L-Pyroglutamic Acid	L-Valine	D,L-Carnitine	Sec-Butylamine	D,L-Octopamine	Putrescine	Dihydroxy Acetone	2,3-Butanediol	2,3-Butanedione	3-Hydroxy-2-Butanone
GPA1	+/-	+	+	-	-	-	-	++	+	-	-	-
S. misionensis	+/-	++	+	+	-	+/-	+/-	++	+	+/-	-	+/-
GPAT2	++	++	++	+	-	+/-	+/-	++	+/-	+/-	-	+
GPN2	+	++	+	+	+/-	+/-	-	++	+/-	+/-	-	+/-
