# Supplementary material for: Genomic and biological characterization of Streptomyces strains isolated from barley
Source: Research Square preprint supplement (doi:10.21203/rs.3.rs-6679830/v1), 2025-05-30
Supplement: Supplementary file 1 [file 43e9b0db8b61bab7d7124042.pdf]

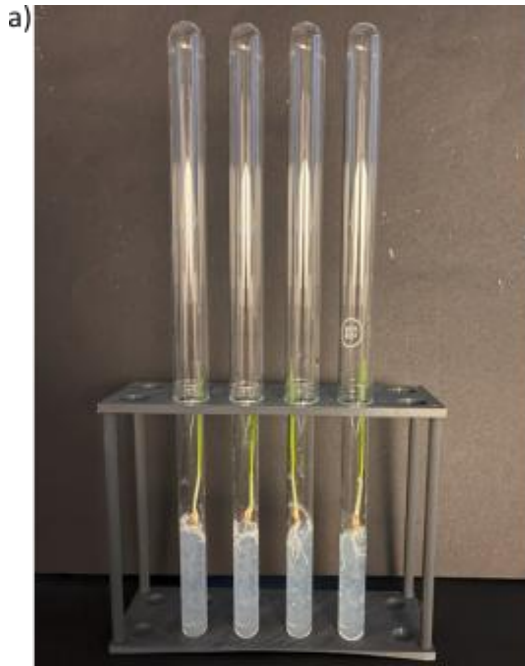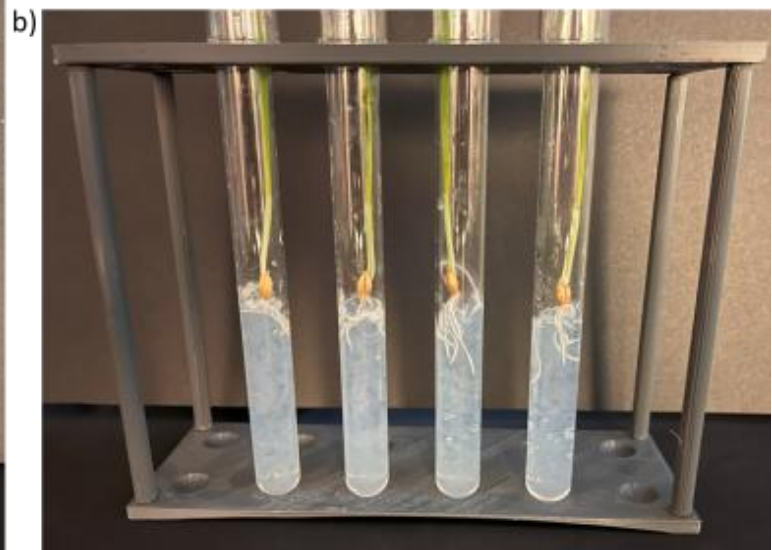

**Additional file 1: Barley hydroponic growing system.** The system consists of a 16 mm tube containing 9 mL of fragmented sterile semi solid MS medium (agarose 8 g/L). Before seed transfer, an inoculum of 1 mL of bacterial suspension at  $1 \times 10^4$  to  $5 \times 10^4$  CFU/mL or 1 mL of sterile liquid MS (as a control) was added. The tubes were then vortexed for 5 seconds to distribute the liquid between the agar agglomerates. The germinated seeds were placed in the test tubes using sterile forceps so that the radicle was in contact with the agar medium. Finally, the 16 mm tubes were placed in a raised rack and topped with a 20 mm diameter test tube to cover the smaller diameter tube at a height of 14 cm.

10     **Additional file2: qPCR primers used in this study**

| Targeted organisms          | Targeted genes | Primers                                                      | References                                  |
|-----------------------------|----------------|--------------------------------------------------------------|---------------------------------------------|
| Barley                      | <i>hsp90</i>   | 5'-AGGAGTTTGAGGGCAAGAAGC-3'<br>5'-CCAGCACCTCCTTGATGACC-3'    | Zhang <i>et al.</i> ,<br>2018 <sup>11</sup> |
|                             | <i>cyp2</i>    | 5'-CCTGTCGTGTCGTCGGTCTAAA-3'<br>5'-ACGCAGATCCAGCAGCCTAAAG-3' | Zhang <i>et al.</i> ,<br>2018 <sup>12</sup> |
| <i>Streptomyces</i> strains | <i>rpbA</i>    | 5'-CTTCGAGATGCCCTTCTCGG-3'<br>5'-GGGCTTGGCCTTCTTCCT-3'       | This study <sup>13</sup>                    |

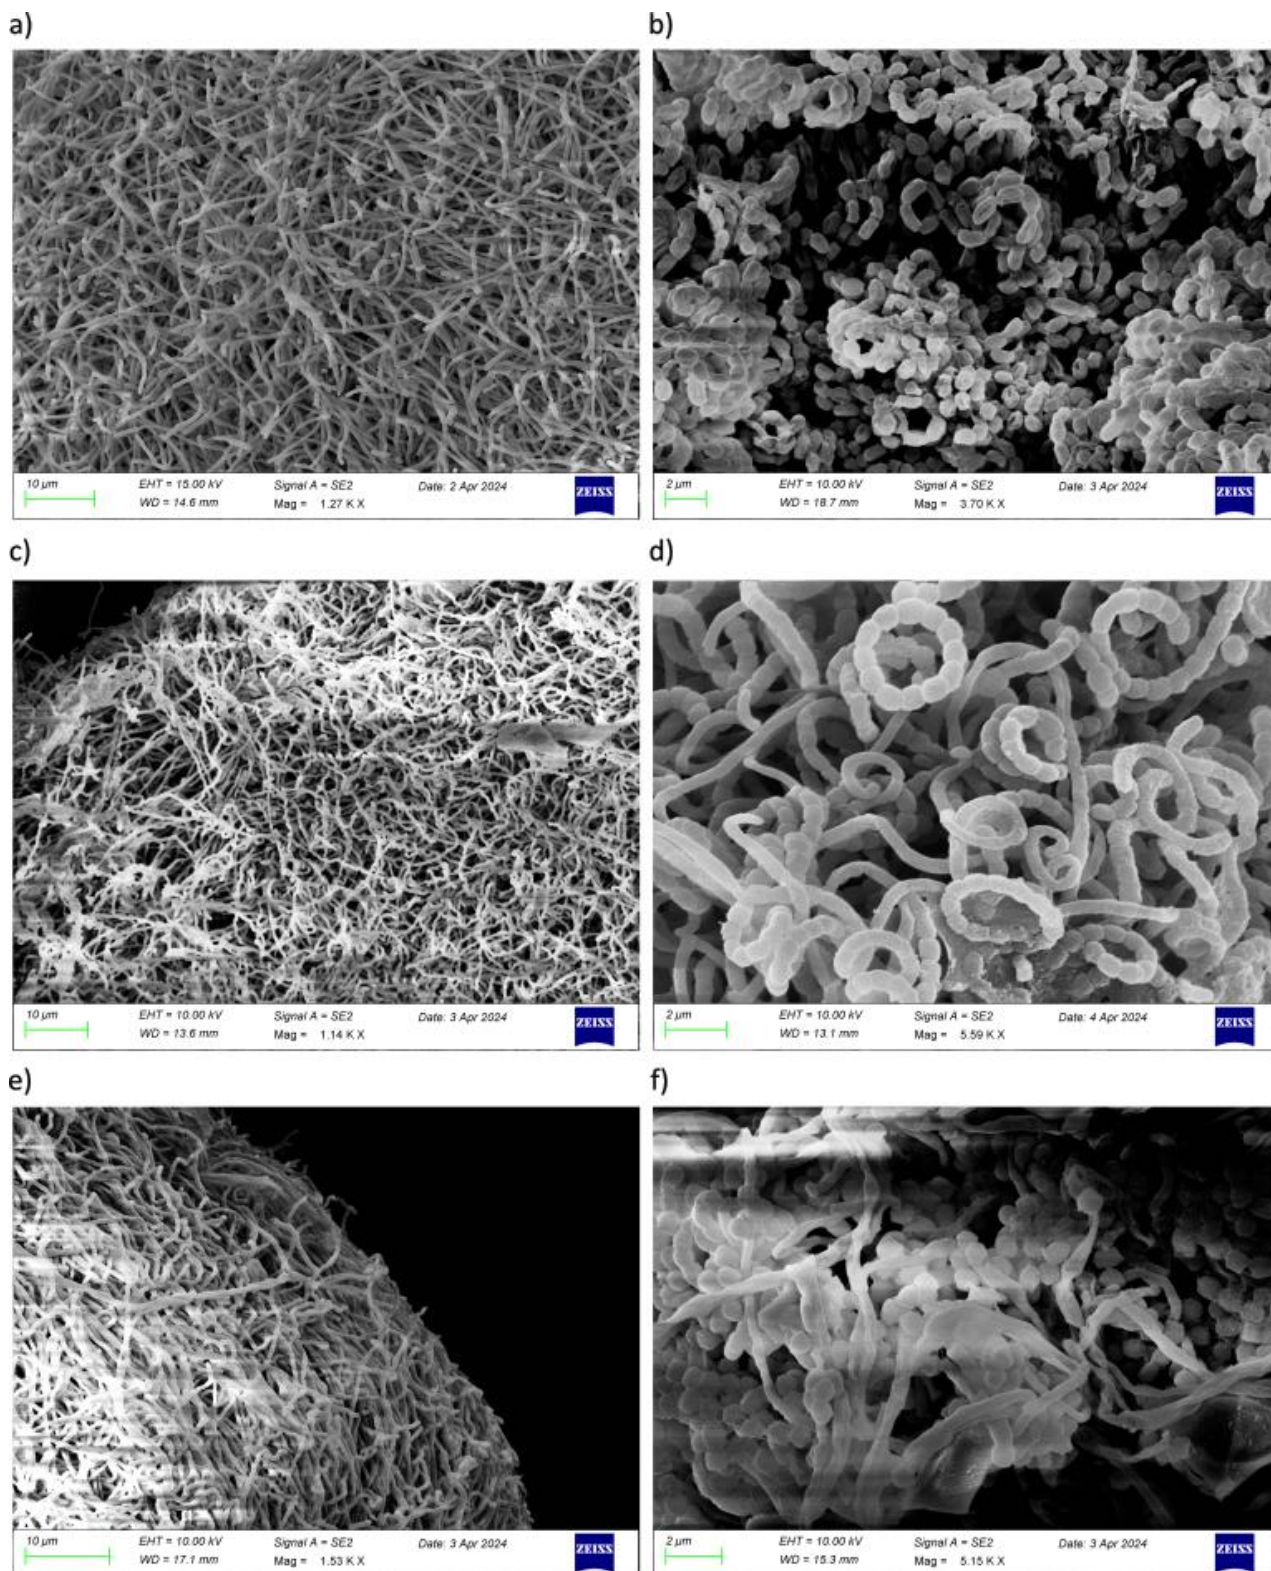

**Additional file 3: Scanning electron microscope observation of *Streptomyces* sp. GPA1, GPAT2 and GPN2.** a) Filaments and b) spores observation of *Streptomyces* sp. GPA1. c) Filaments and d) spores observation of *Streptomyces* sp. GPAT2. e) Filaments and f) spores observation of *Streptomyces* sp. GPN2. Cultures were prepared on solid GYM medium during 2 days for the filament observations and on Mannitol Mungo solid medium during 7 days for spore observations.

Tree scale: 0.1

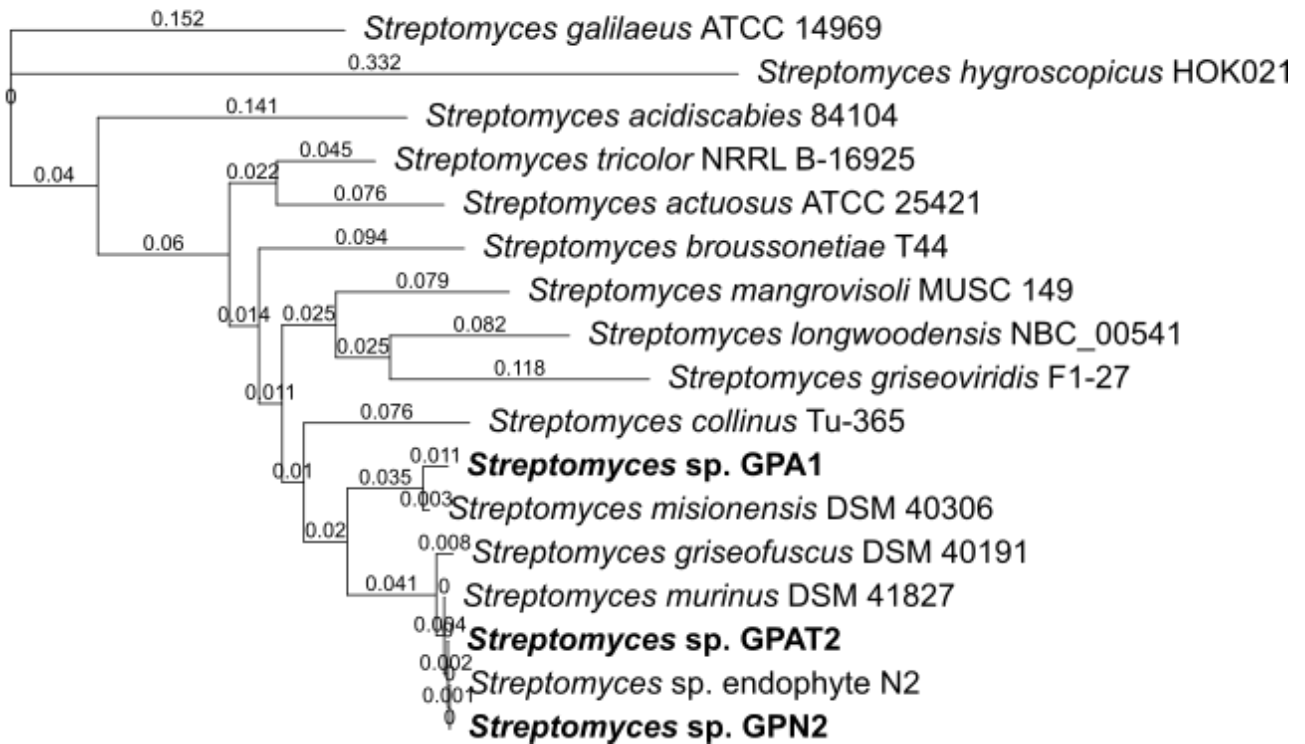

20

21 **Additional file 4: Phylogenetic trees based on the *rpoB* sequences of *Streptomyces* sp. GPA1,**  
 22 **GPAT2 and GPN2.** The tree was produced using the BOOSTER platform (BOOtstrap Support by  
 23 TransfER) [1] and PhyML-SMS workflow. The tree was implemented in the Interactive Tree OfLife  
 24 (iTOL) software (v.6.9.1) [2]. The black numbers at the branch level represent branch length values.

25 **Additional file 5: Optical density of *Streptomyces* sp. GPA1/GPAT2/GPN2 and *S. misionensis***  
26 **in Biolog PM1 and PM2A microarrays.** The optical density (590 nm) was measured after one week  
27 of growth and the optical density of the control was subtracted from those values. Arbitrarily, we  
28 have defined 4 different growth patterns, depending on the optical density measured: no growth for  
29 optical densities below 0.05 (-), slight growth for optical densities between 0.05 and 0.2 (+/-), average  
30 growth for optical densities between 0.2 and 0.5 (+) and efficient growth for optical densities above  
31 0.5 (++).

32

33 **See .xlsx file**

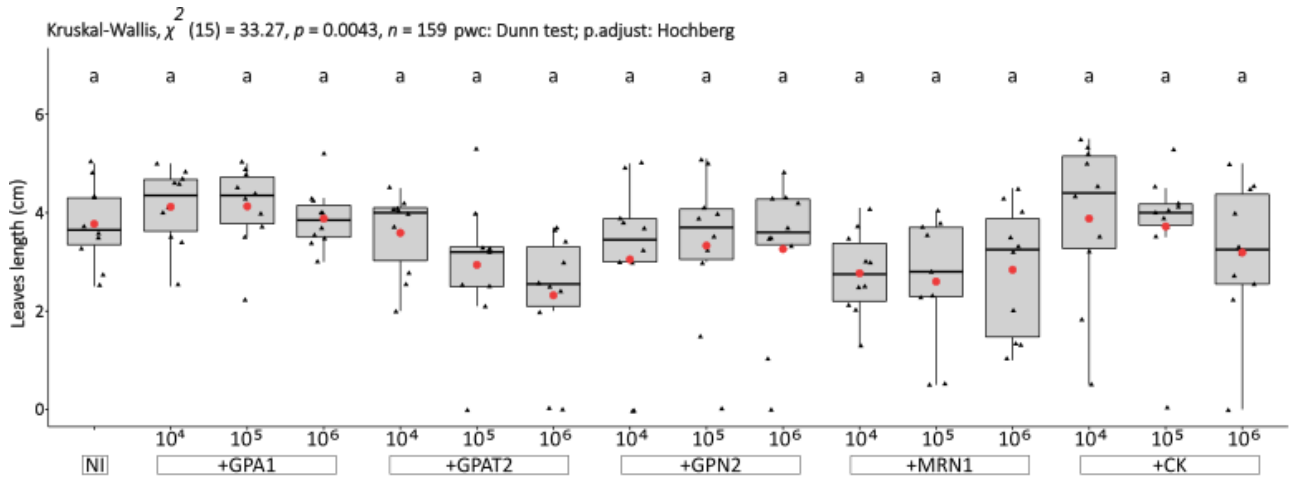

**Additional file 6: Effects of microorganisms on leaves size during barley germination.** Barley Bowman seeds were inoculated by immersion in microbial suspension containing *Streptomyces* sp. GPA1, GPAT2, GPN2, *Pseudomonas* sp. MRN1 or *Fusarium* sp. CK at different concentrations (10<sup>6</sup>, 10<sup>5</sup>, 10<sup>4</sup> CFU or spores/mL). Inoculated seeds were placed on MS media and incubated in culture chamber in the dark for 5 days. Leaves length was measured 5 days after inoculation and compared to the leave size of non-inoculated seedlings. Differences were statistically tested using a Kruskal-Wallis test followed by a pairwise Dunn test with Hochberg correction. Different letters indicate significant root size differences (p-values < 0.05). 10 replicates per condition were carried out except for *Pseudomonas* sp. MRN1 at concentration 10<sup>5</sup> CFU/mL where 9 seeds were measured.

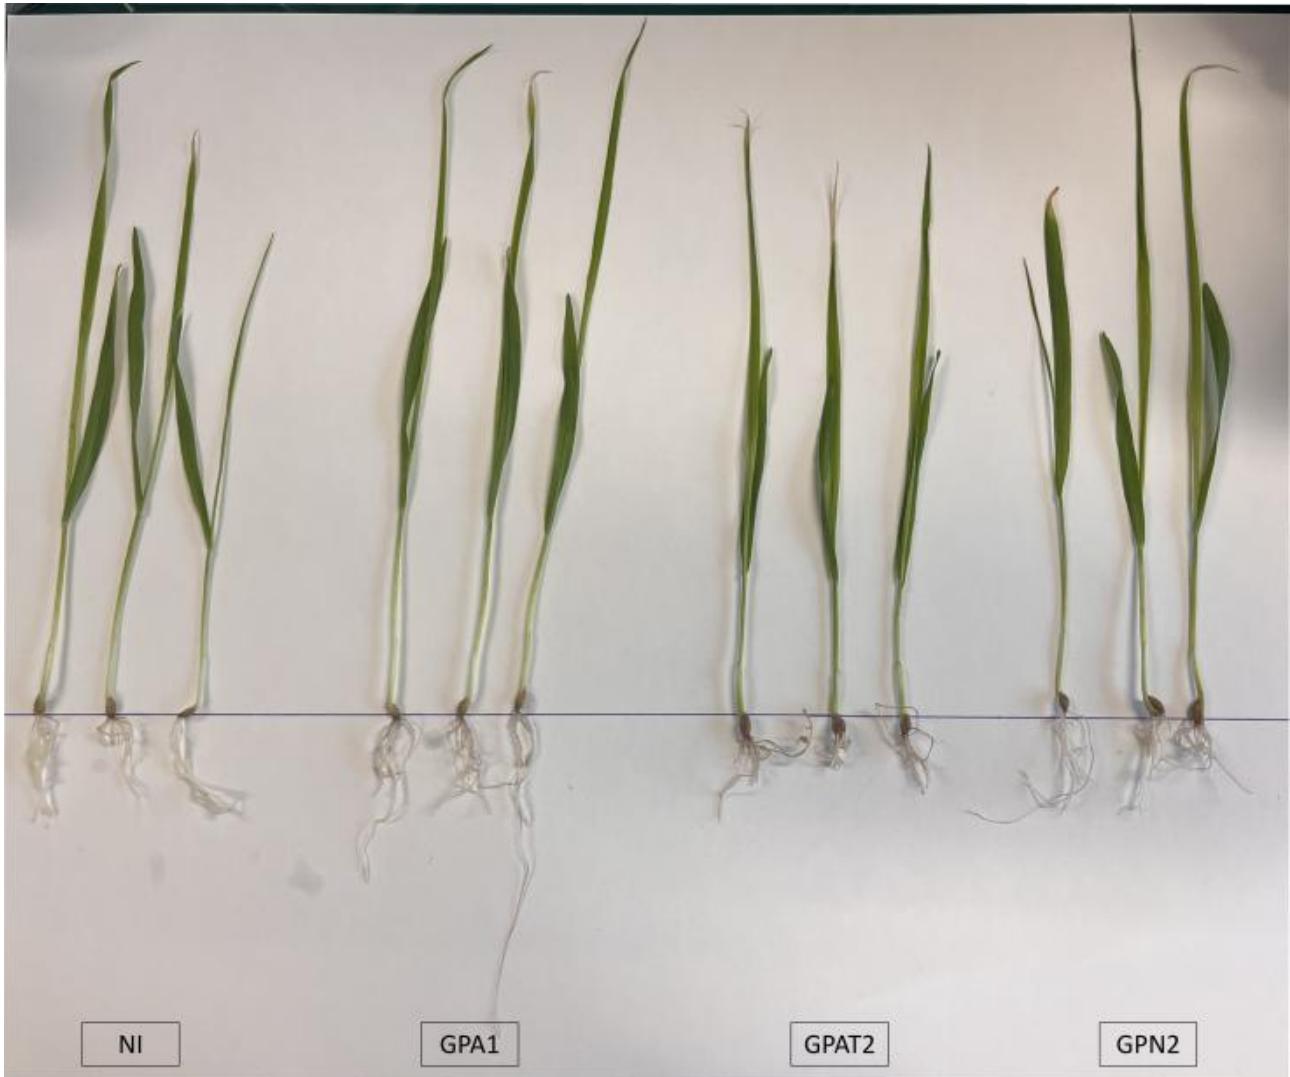

44

45 **Additional file 7: Barley seedlings grown in the hydroponic system at 14 dpi.** NI: Non-inoculated  
46 seedlings, GPA1: seedlings inoculated with GPA1, GPAT2: seedlings inoculated with GPAT2,  
47 GPN2: seedlings inoculated with GPN2. Seedlings were selected at random from a pool of 19 for  
48 non-inoculated seedlings and 20 for other conditions.



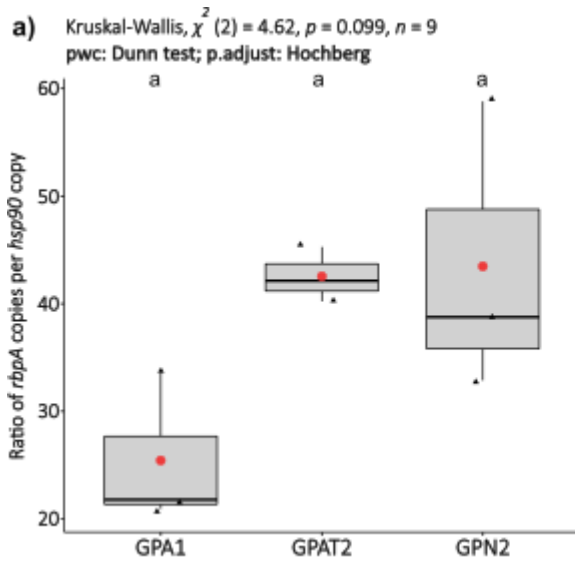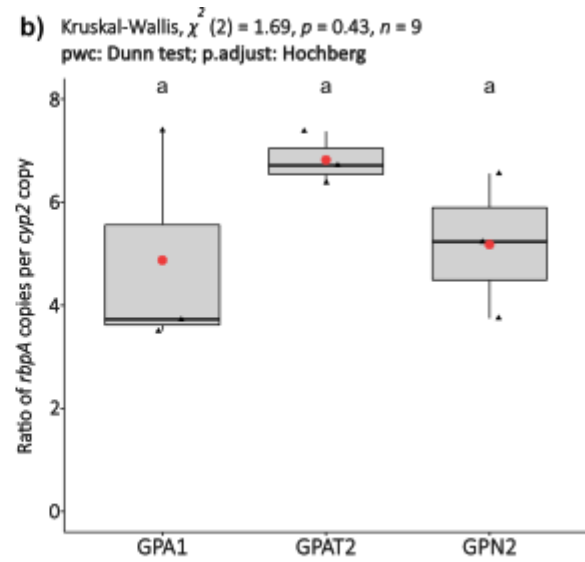

49

50 **Additional file 8: Quantification of the root colonization of *Streptomyces* sp. GPA1, GPAT2 and**  
 51 **GPN2 by qPCR.** Quantification of the colonization efficiency of *Streptomyces* strains by qPCR using  
 52 a) *rbpA/hsp90* primers. b) *rbpA/cyp2* primers. The test used for the qPCR results was a Kruskal-  
 53 Wallis test followed by a pairwise Dunn test with Hochberg correction. 3 replicates were carried out  
 54 for each sample. Different letters indicate significant differences (p-values < 0.05).



55 **Additional file 9: General characteristics of the *Streptomyces* genomes.** <sup>a</sup>Calculation of repetitive  
56 regions did not include undetermined ('N') bases. <sup>b</sup>Completeness was estimated using CheckM [3].  
57 In bold: the activity was confirmed using Biologs tests

| Genome characteristics                                 | GPA1                                                                                                                                   | <i>Streptomyces misionensis</i> DSM 40306                                                                                                    | GPAT2                                                                                                                                | GPN2                                                                                                                                  | <i>Streptomyces murinus</i> DSM 41827                                                      |
|--------------------------------------------------------|----------------------------------------------------------------------------------------------------------------------------------------|----------------------------------------------------------------------------------------------------------------------------------------------|--------------------------------------------------------------------------------------------------------------------------------------|---------------------------------------------------------------------------------------------------------------------------------------|--------------------------------------------------------------------------------------------|
| Size (bp)                                              | 8077379                                                                                                                                | 8474121                                                                                                                                      | 8543218                                                                                                                              | 8424890                                                                                                                               | 8564314                                                                                    |
| GC-content (%)                                         | 72.26                                                                                                                                  | 72.38                                                                                                                                        | 71.79                                                                                                                                | 71.83                                                                                                                                 | 71.74                                                                                      |
| Predicted CDS                                          | 9552                                                                                                                                   | 7874                                                                                                                                         | 7985                                                                                                                                 | 7793                                                                                                                                  | 7715                                                                                       |
| Genome coding (%)                                      | 90.66                                                                                                                                  | 88.57                                                                                                                                        | 89.52                                                                                                                                | 89.68                                                                                                                                 | 89                                                                                         |
| Average CDS size (bp)                                  | 912.72                                                                                                                                 | 967.75                                                                                                                                       | 976.52                                                                                                                               | 986.88                                                                                                                                | 1001.67                                                                                    |
| Number of tRNA                                         | 21                                                                                                                                     | 21                                                                                                                                           | 22                                                                                                                                   | 22                                                                                                                                    | 22                                                                                         |
| Number of 16S encoding gene                            | 2                                                                                                                                      | 6                                                                                                                                            | 7                                                                                                                                    | 7                                                                                                                                     | 7                                                                                          |
| Repetitive regions (%) <sup>a</sup>                    | 6.78                                                                                                                                   | 8.83                                                                                                                                         | 8.28                                                                                                                                 | 8.41                                                                                                                                  | 8.42                                                                                       |
| Nb of scaffold                                         | 11                                                                                                                                     | 5                                                                                                                                            | 0<br>(chromosome)                                                                                                                    | 2                                                                                                                                     | 2                                                                                          |
| Completeness (%) <sup>b</sup>                          | 100                                                                                                                                    | 100                                                                                                                                          | 99.89                                                                                                                                | 99.89                                                                                                                                 | 99.89                                                                                      |
| Putative genes involved in plant-bacteria interactions |                                                                                                                                        |                                                                                                                                              |                                                                                                                                      |                                                                                                                                       |                                                                                            |
| Polymer degradation                                    | 1,4- $\beta$ -xylan ( <i>xlnA</i> , <i>xlnB</i> ), cellulose (SGPA1_v2_4 0428-40433), <b>glycogen</b> , and chitin ( <i>chi</i> genes) | 1,4- $\beta$ -xylan ( <i>xlnA</i> , <i>xlnB</i> ), cellulose, <b>glycogen</b> , and chitin ( <i>chi</i> genes)                               | 1,4- $\beta$ -xylan ( <i>xlnA</i> , <i>xlnB</i> ), cellulose (GPAT2_v1_7 842-7846), <b>glycogen</b> , and chitin ( <i>chi</i> genes) | 1,4- $\beta$ -xylan ( <i>xlnA</i> , <i>xlnB</i> ), cellulose (GPN2_v1_20 270-20274), <b>glycogen</b> , and chitin ( <i>chi</i> genes) | 1,4- $\beta$ -xylan ( <i>xlnA</i> , <i>xlnB</i> ), cellulose, <b>glycogen</b> , and chitin |
| Other degradation capacities                           | <b>Putrescine</b> <i>patD</i> (SGPA1_v2_1 1389-11390 and SGPA1_v2_11 408), <i>patA</i> (SGPA1_v2_1 0991)                               | <b>Putrescine</b> <i>patA</i> and <i>D</i> ,                                                                                                 | <b>Putrescine</b> <i>patD</i> (GPAT2_v1_5 813 GPAT2_v1_58 26), <i>patA</i> (GPAT2_v1_6 154)                                          | <b>Putrescine</b> <i>patD</i> (GPN2_v1_22 152 - GPN2_v1_221 65), <i>patA</i> (GPN2_v1_21 830)                                         | <b>Putrescine</b> <i>patA</i> and <i>D</i>                                                 |
| Genes involved in degradation of                       | <b>fructose, D-mannose, L-arabinose</b> , lactose, <b>galactose</b> , maltose, melibiose, <b>ribose</b> , <b>glycerol</b> and xylose   | <b>fructose, D-mannose, L-arabinose</b> , lactose, <b>galactose</b> , maltose, <b>melibiose</b> , <b>ribose</b> , <b>glycerol</b> and xylose | <b>D-mannose</b> , lactose, <b>galactose</b> , <b>maltose</b> , <b>melibiose</b> , <b>ribose</b> , <b>glycerol</b> and xylose        | <b>D-mannose</b> , lactose, <b>galactose</b> , <b>maltose</b> , <b>melibiose</b> , <b>ribose</b> , <b>glycerol</b> and xylose         | D-mannose, lactose, galactose, maltose, melibiose, ribose, glycerol and xylose             |

|                                                                       |                                                                                                                                                                                           |                                                                                                     |                                                                                                                                                  |                                                                                                                                                  |                                                                                                                                                  |
|-----------------------------------------------------------------------|-------------------------------------------------------------------------------------------------------------------------------------------------------------------------------------------|-----------------------------------------------------------------------------------------------------|--------------------------------------------------------------------------------------------------------------------------------------------------|--------------------------------------------------------------------------------------------------------------------------------------------------|--------------------------------------------------------------------------------------------------------------------------------------------------|
| Nitrogen fixation                                                     | nd <sup>c</sup>                                                                                                                                                                           | nd <sup>c</sup>                                                                                     | nd <sup>c</sup>                                                                                                                                  | nd <sup>c</sup>                                                                                                                                  | nd <sup>c</sup>                                                                                                                                  |
| <b>Siderophore</b>                                                    | <i>rhbEB</i><br>(SGPA1_v2_3<br>1337-31338),<br><i>rhbC</i><br>(SGPA1_v2_1<br>1231),<br><i>feuV-fepDG</i><br>(SGPA1_v2_2<br>0005-20007)                                                    | <i>rhbEB, rhbC,</i><br><i>feuV-fepDG</i>                                                            | <i>rhbEB</i><br>(GPAT2_v1_2<br>287-2288),<br><i>feuV-fepDG</i><br>(GPAT2_v1_2<br>052-2054),<br><i>dhbABCEF</i><br>(GPAT2_v1_7<br>361-7368)       | <i>rhbEB</i><br>(GPN2_v1_12<br>234-12236),<br><i>feuV-fepDG</i><br>(GPN2_v1_12<br>476-12478),<br><i>dhbABCEF</i><br>(GPN2_v1_20<br>605-20612)    | <i>rhbEB, feuV-</i><br><i>fepDG,</i><br><i>dhbABCEF</i>                                                                                          |
| <b>Phosphate solubilization</b>                                       | <i>gdh</i><br>(SGPA1_v2_1<br>0359, 31446,<br>40417),<br><i>pqq</i><br>(SGPA1_v2_2<br>1676,21677,21<br>678,21679,216<br>78,21681)                                                          | 3 <i>gdh</i> genes,<br>3 <i>pqq</i> genes                                                           | <i>gdh</i><br>(GPAT2_v1_2<br>205, 6818,<br>7856)                                                                                                 | <i>gdh</i><br>(GPN2_v1_12<br>322, 20259,<br>21164)                                                                                               | 3 <i>gdh</i> genes                                                                                                                               |
| <i>Quorum sensing</i><br>A-factor synthesis<br>(□ -<br>butyrolactone) | <i>barS,</i><br>(SGPA1_v2_2<br>1530, 21911)                                                                                                                                               | 2 <i>barS</i> genes                                                                                 | <i>barS</i><br>(GPAT2_v1_0<br>550)                                                                                                               | <i>barS</i><br>(GPN2_v1_13<br>560, 13908)                                                                                                        | 2 <i>barS</i> genes                                                                                                                              |
| <i>Phytohormone</i><br><i>homeostasis</i><br>IAA synthesis            | <b>Putative <i>iaaH</i></b><br><b>(hydrolase,</b><br><b>SGPA1_v2_20</b><br><b>424) <i>iaaM</i></b><br><b>(tryptophan 2-</b><br><b>monooxygenase,</b><br><b>SGPA1_v2_20</b><br><b>425)</b> | Putative <i>iaaH</i><br>and <i>iaaM</i>                                                             | Putative <i>iaaH</i><br>(hydrolase,<br>GPAT2_v1_16<br>60) <i>iaaM</i><br>(tryptophan 2-<br>monooxygenase,<br>GPAT2_v1_16<br>59)                  | Putative <i>iaaH</i><br>(hydrolase,<br>GPN2_v1_128<br>70) <i>iaaM</i><br>(tryptophan 2-<br>monooxygenase,<br>GPN2_v1_128<br>71)                  | Putative <i>iaaH</i><br>and <i>iaaM</i>                                                                                                          |
| Cytokinin synthesis                                                   | <i>log</i><br>(SGPA1_v2_1<br>1602, SGPA1-<br>v2-12009,<br>SGPA1_v2_40<br>878)                                                                                                             | 2 <i>log</i> genes                                                                                  | <i>log</i><br>(GPAT2_v1_5<br>256,<br>GPAT2_v1_56<br>38)                                                                                          | <i>log</i><br>(GPN2_v1_22<br>341,<br>GPN2_v1_227<br>19)                                                                                          | 2 <i>log</i> genes                                                                                                                               |
| <i>Secondary metabolites</i><br>Number of BGCs<br>(AntiSMASH)         | 29<br>(geosmin,<br>albaflavenone,<br>pyrrolizixenamide A,<br>desferrioxamine E, melanin,<br>ectoine)                                                                                      | 28<br>(geosmin,<br>albaflavenone,<br>desferrioxamine E, melanin,<br>ectoine, filipin,<br>curamycin) | 36<br>(geosmin,<br>albaflavenone,<br>desferrioxamine E, melanin,<br>ectoine,<br>pentamycin,<br>albusnodin,<br>curamycin, 2-<br>methylisoborneol) | 34<br>(geosmin,<br>albaflavenone,<br>desferrioxamine E, melanin,<br>ectoine,<br>pentamycin,<br>albusnodin,<br>curamycin, 2-<br>methylisoborneol) | 34<br>(geosmin,<br>albaflavenone,<br>desferrioxamine E, melanin,<br>ectoine,<br>pentamycin,<br>albusnodin,<br>curamycin, 2-<br>methylisoborneol) |
| <i>Biofilm formation and regulation</i>                               | <i>vbfa</i> ,<br>(SGPA1_v2_3<br>1568)                                                                                                                                                     | <i>vbfa</i>                                                                                         | <i>vbfa</i><br>(GPAT2_v1_2<br>102)                                                                                                               | <i>vbfa</i><br>(GPN2_v1_12<br>428)                                                                                                               | <i>vbfa</i>                                                                                                                                      |

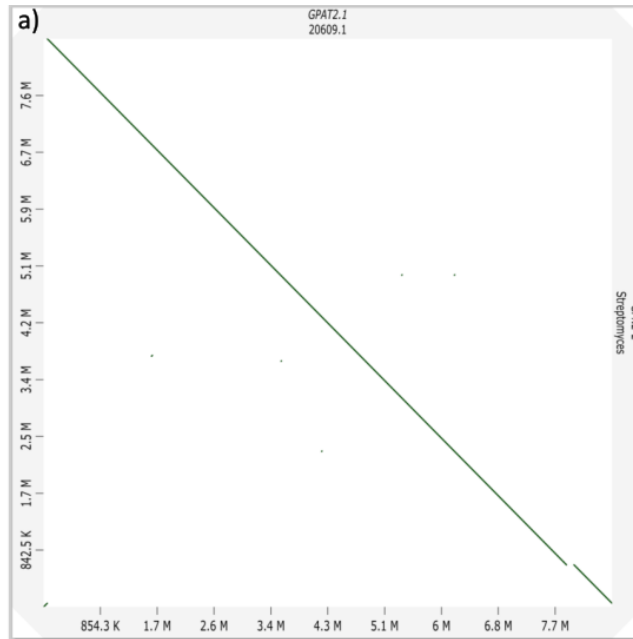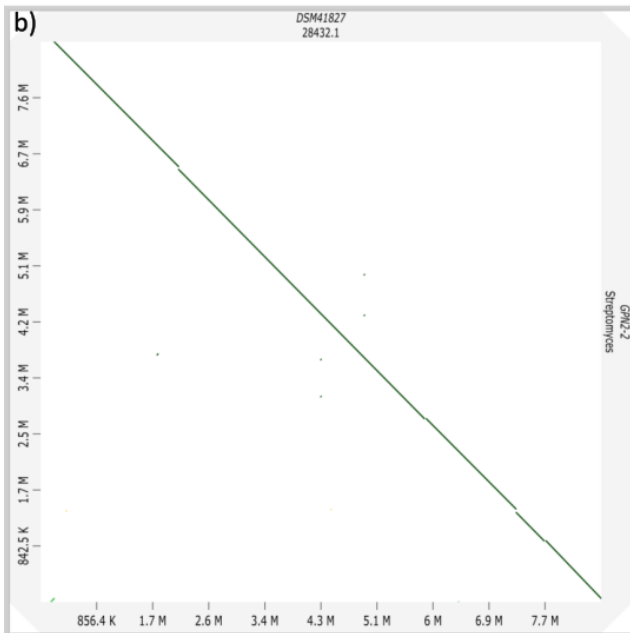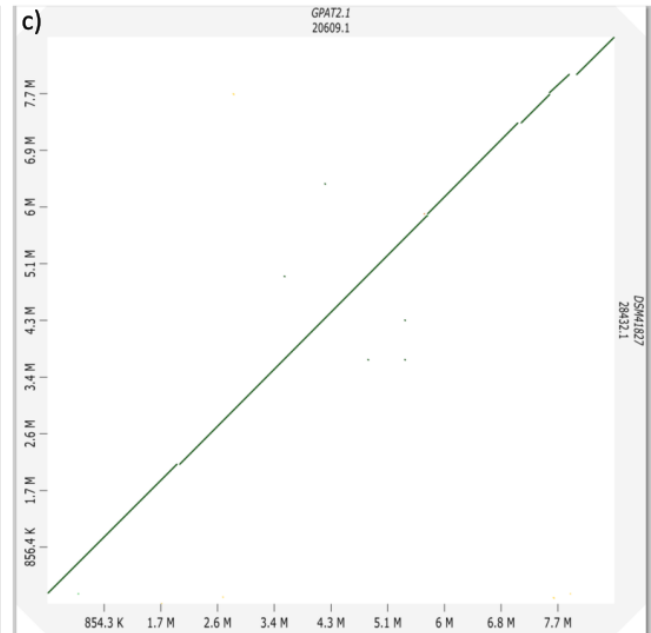

58

59 **Additional file 10: Syntenies between *Streptomyces* sp GPAT2, GPN2 and *S. murinus* DSM**  
60 **41827.** Dot plot showing the genomic similarities between a) *Streptomyces* sp. GPAT2 and  
61 *Streptomyces* sp. GPN2, b) *S. murinus* DSM 41827 and *Streptomyces* sp. GPN2 and c) *S. murinus*  
62 DSM 41827 and *Streptomyces* sp. GPAT2. These figures were produced using the D-genies platform  
63 [4].

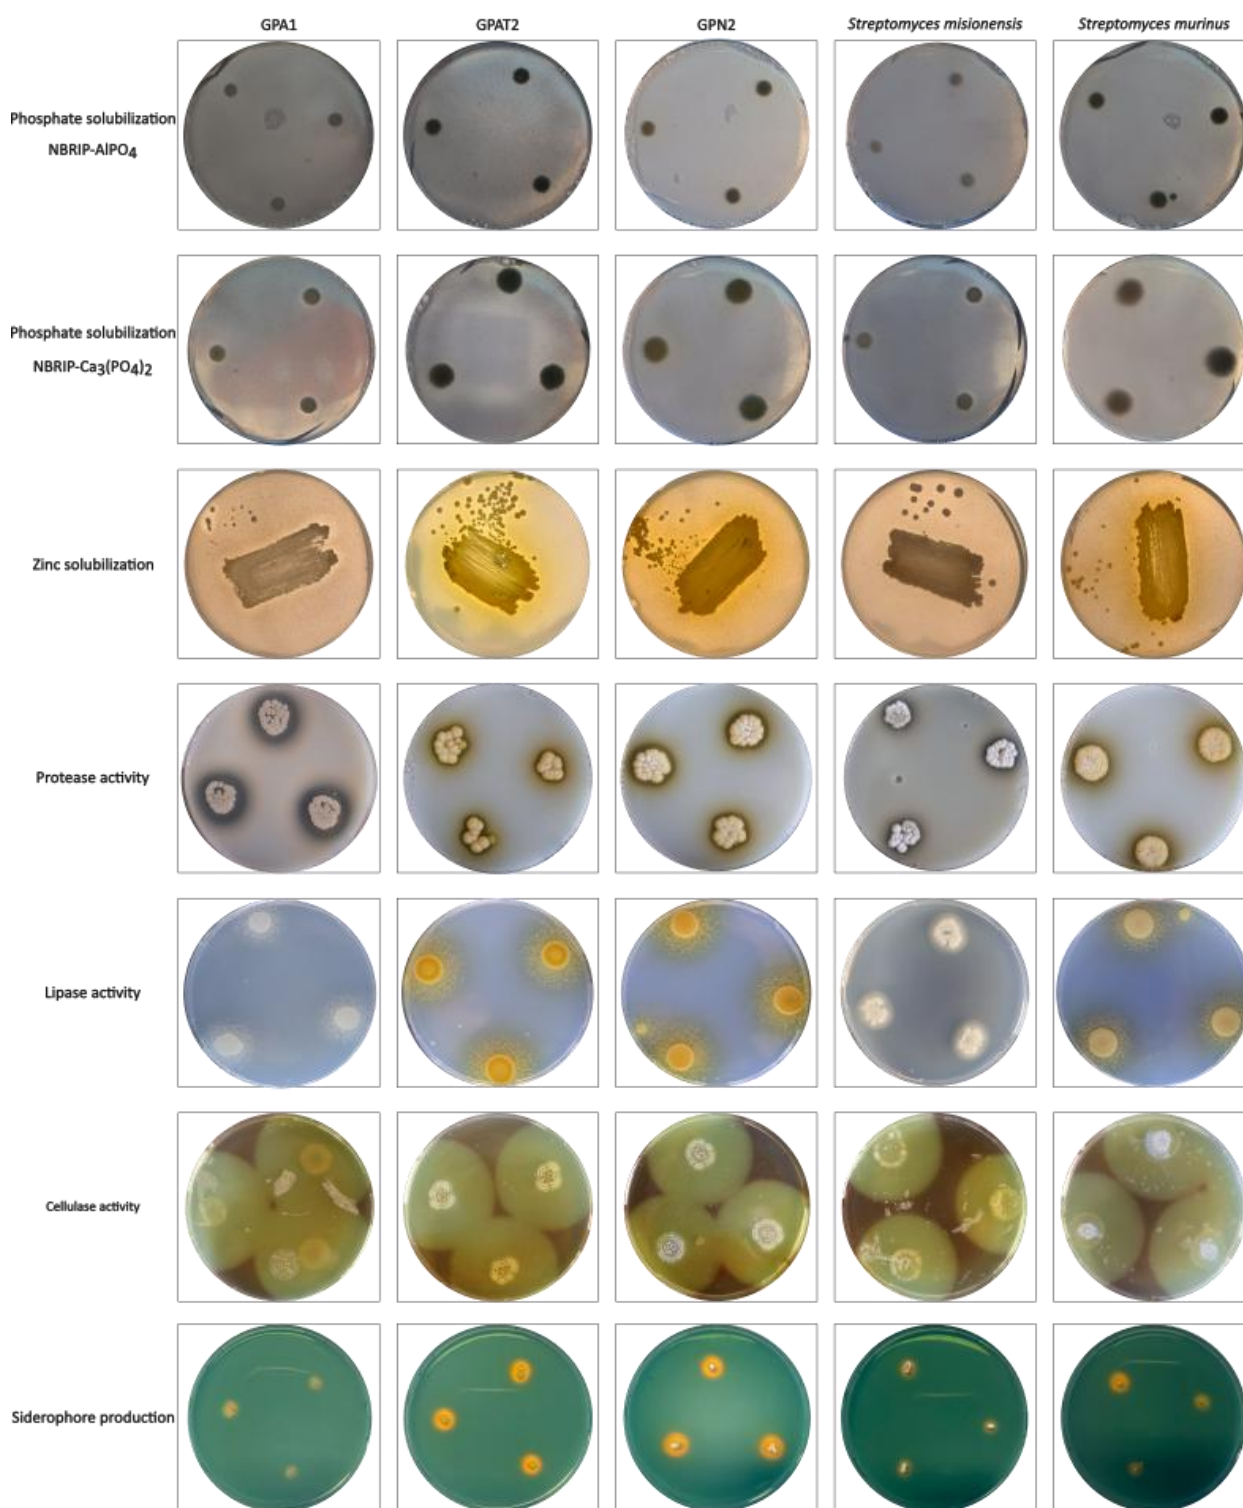

**Additional file 11: PGP activities test in vitro of *Streptomyces* strains.** In vitro tests were carried out jointly for all *Streptomyces* strains. For that, 50 mL of GYM liquid medium was inoculated with the *Streptomyces* strains. 10  $\mu\text{L}$  of unwashed bacterial culture were deposited in triplicate on the different media. Controls were performed with 10  $\mu\text{L}$  of non-inoculated GYM medium. Petri dishes were incubated at 28°C for 7 days. The different media used are described in the Methods section.

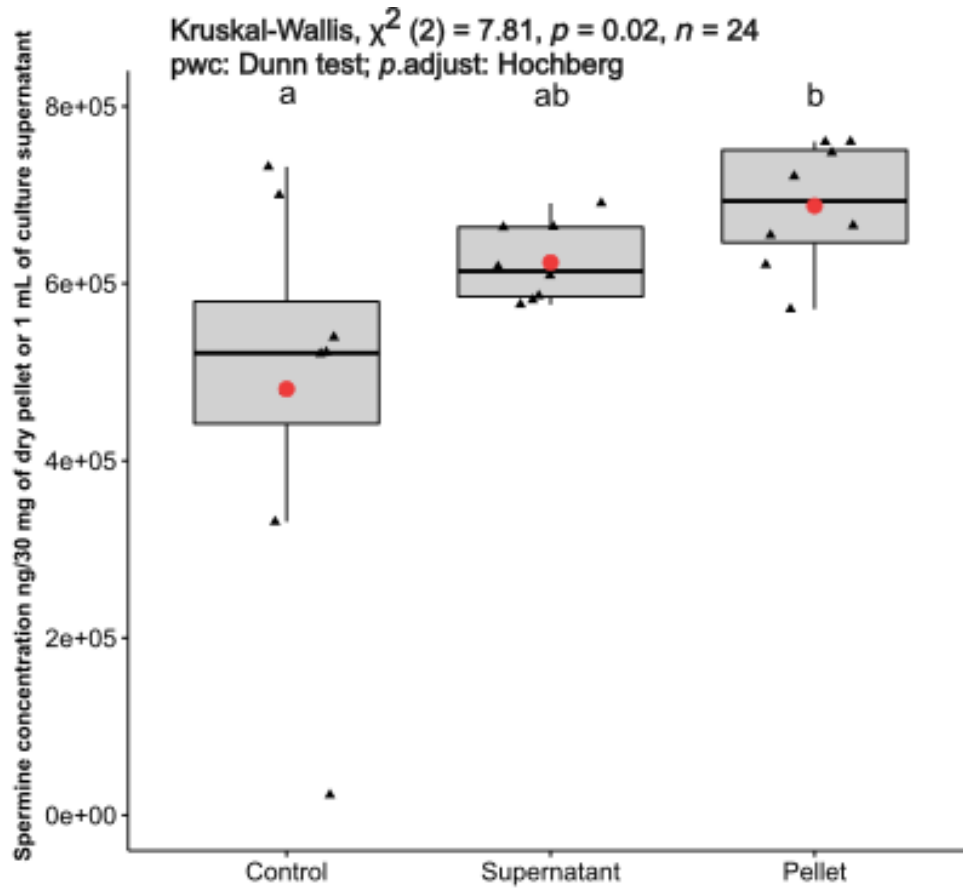

70

71 **Additional file 12: Spermine concentration measured in *Streptomyces* sp. GPA1 pellet and**  
 72 **culture supernatant.** Targeted metabolomics were performed by ultrahigh-performance liquid  
 73 chromatography on GPA1 cell pellet, culture supernatant and non-inoculated control medium.  
 74 Analyses were carried out on 8 biological replicates. Spermine (100 ng/mL) standard was injected  
 75 during the analysis to calibrate and quantify the samples. Differences were statistically tested using a  
 76 Kruskal-Wallis test followed by a pairwise Dunn test with Hochberg correction. Different letters  
 77 indicate statistically significant differences (p-values < 0.05).

78 **References**

- 79 1. BOOSTER platform (Bootstrap Support by TransfER). <https://booster.pasteur.fr/new/>. Accessed 7  
80 Mar 2025.
- 81 2. Interactive Tree Of Life - iTOL. <https://itol.embl.de/>. Accessed 11 Apr 2025.
- 82 3. Parks DH, Imelfort M, Skennerton CT, Hugenholtz P, Tyson GW. CheckM: assessing the quality  
83 of microbial genomes recovered from isolates, single cells, and metagenomes. *Genome Res.*  
84 2015;25:1043–55.
- 85 4. D-Genies. <https://dgenies.toulouse.inra.fr/>. Accessed 27 Nov 2024.

86
